# Supplementary material for: Evolutionary stasis of the pseudoautosomal boundary in strepsirrhine primates
Source: eLife journal article supplement (doi:10.7554/elife.63650), 2020-11-18

Figure 1-figure supplement 1

Synteny analysis of northern greater galago and human X chromosomes. (A) synteny plot of the human and northern greater galago X chromosomes. (B) M:F read depth ratio along the northern greater galago X chromosome. See legend of figure 1 for more details.


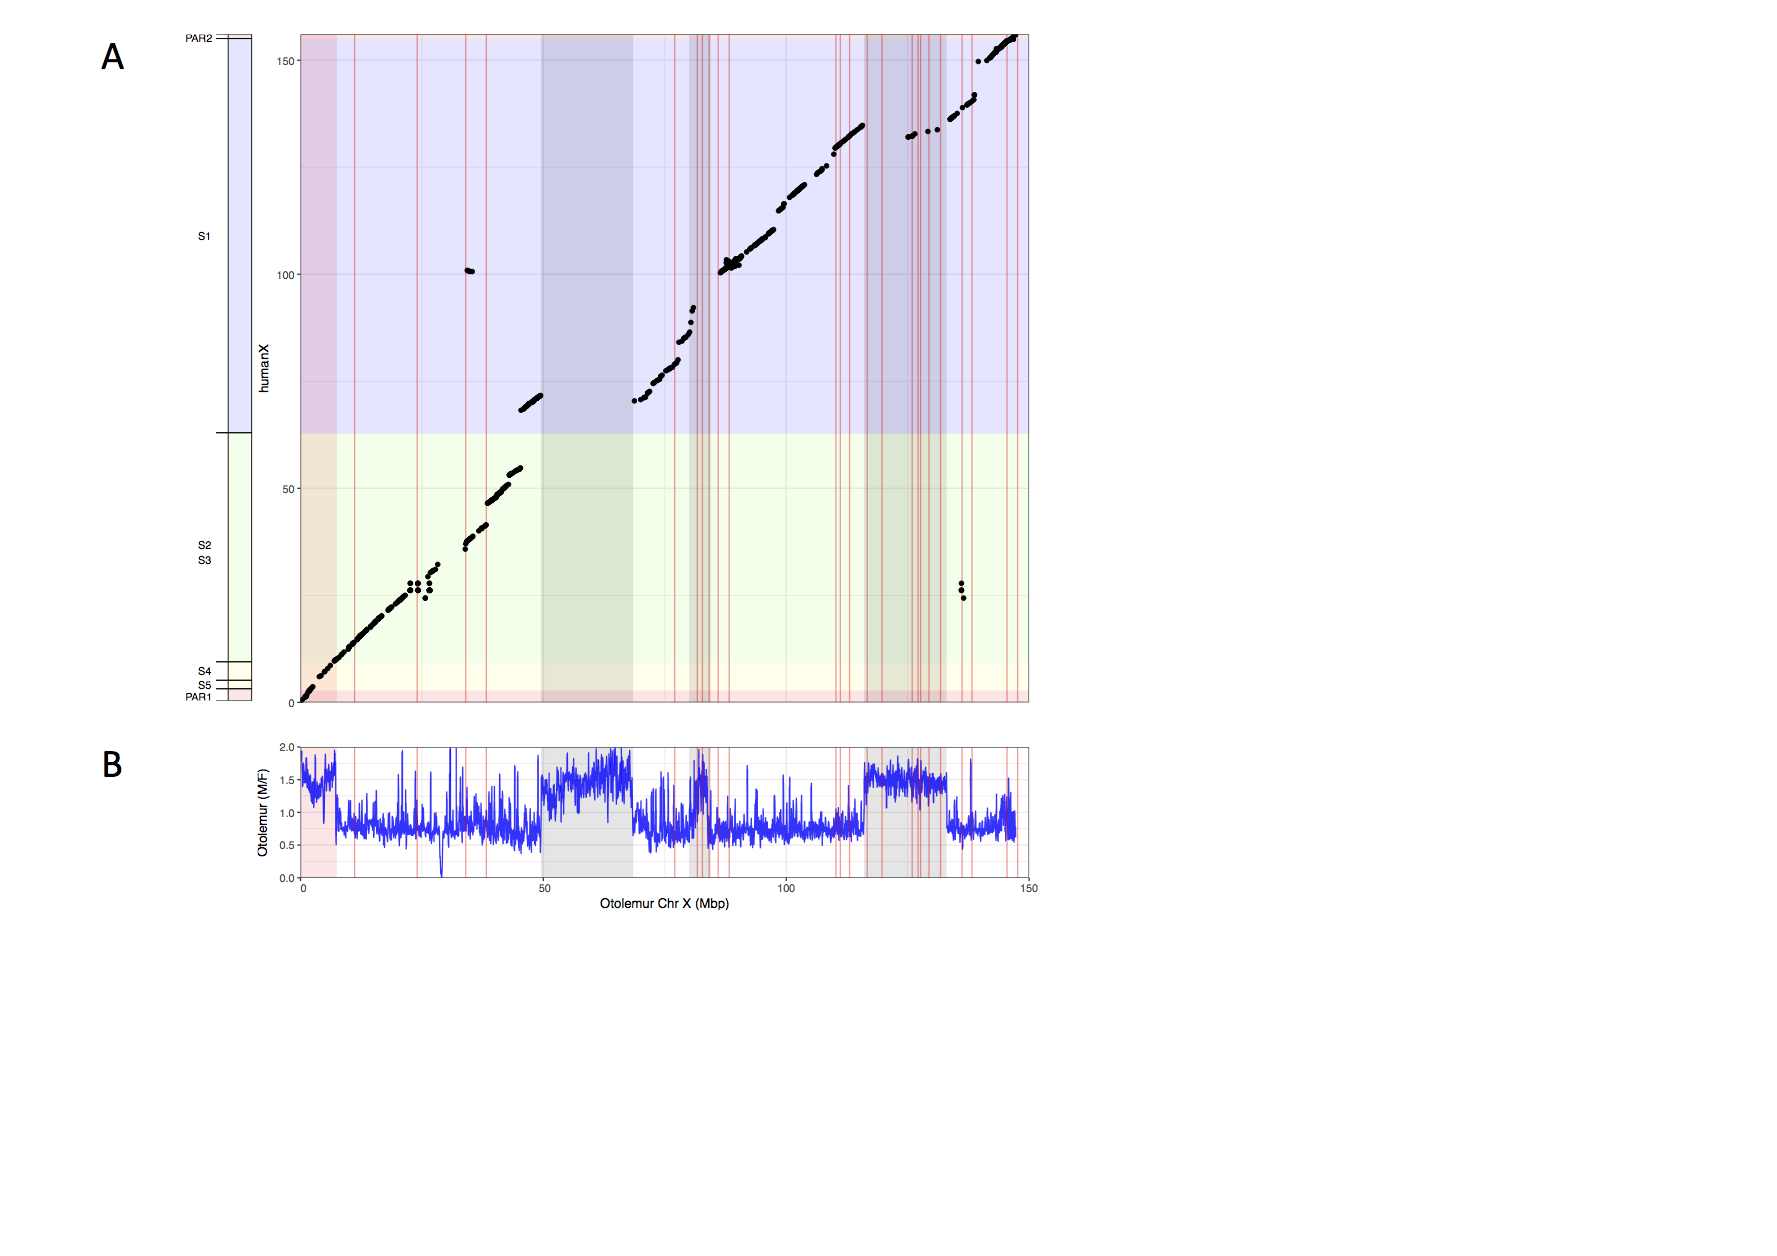

Supplement: supp [file elife_poa_e63650_Figure_1_figure_supplement_1.docx]
