# Supplementary material for: Evolutionary stasis of the pseudoautosomal boundary in strepsirrhine primates
Source: eLife journal article supplement (doi:10.7554/elife.63650), 2020-11-18

Figure 1-figure supplement 2

Zoom-in on the inferred PABs. (A) combined M:F read depth ratio for northern greater galago (red), senegal bushbaby (green), slow loris (blue). (B) combined M:F M:F read depth ratio for aye-ayes (red), gray mouse lemur (blue), red-bellied lemur (light blue), greater bamboo lemur (purple). Position of the PABs in lemurs and lorises is the same (see legend of figure 1 for more details). Positions of the PABs in Mb shown here differ because of differences in the X chromosome assembly between *M. murinus* and *O. garnetti*.


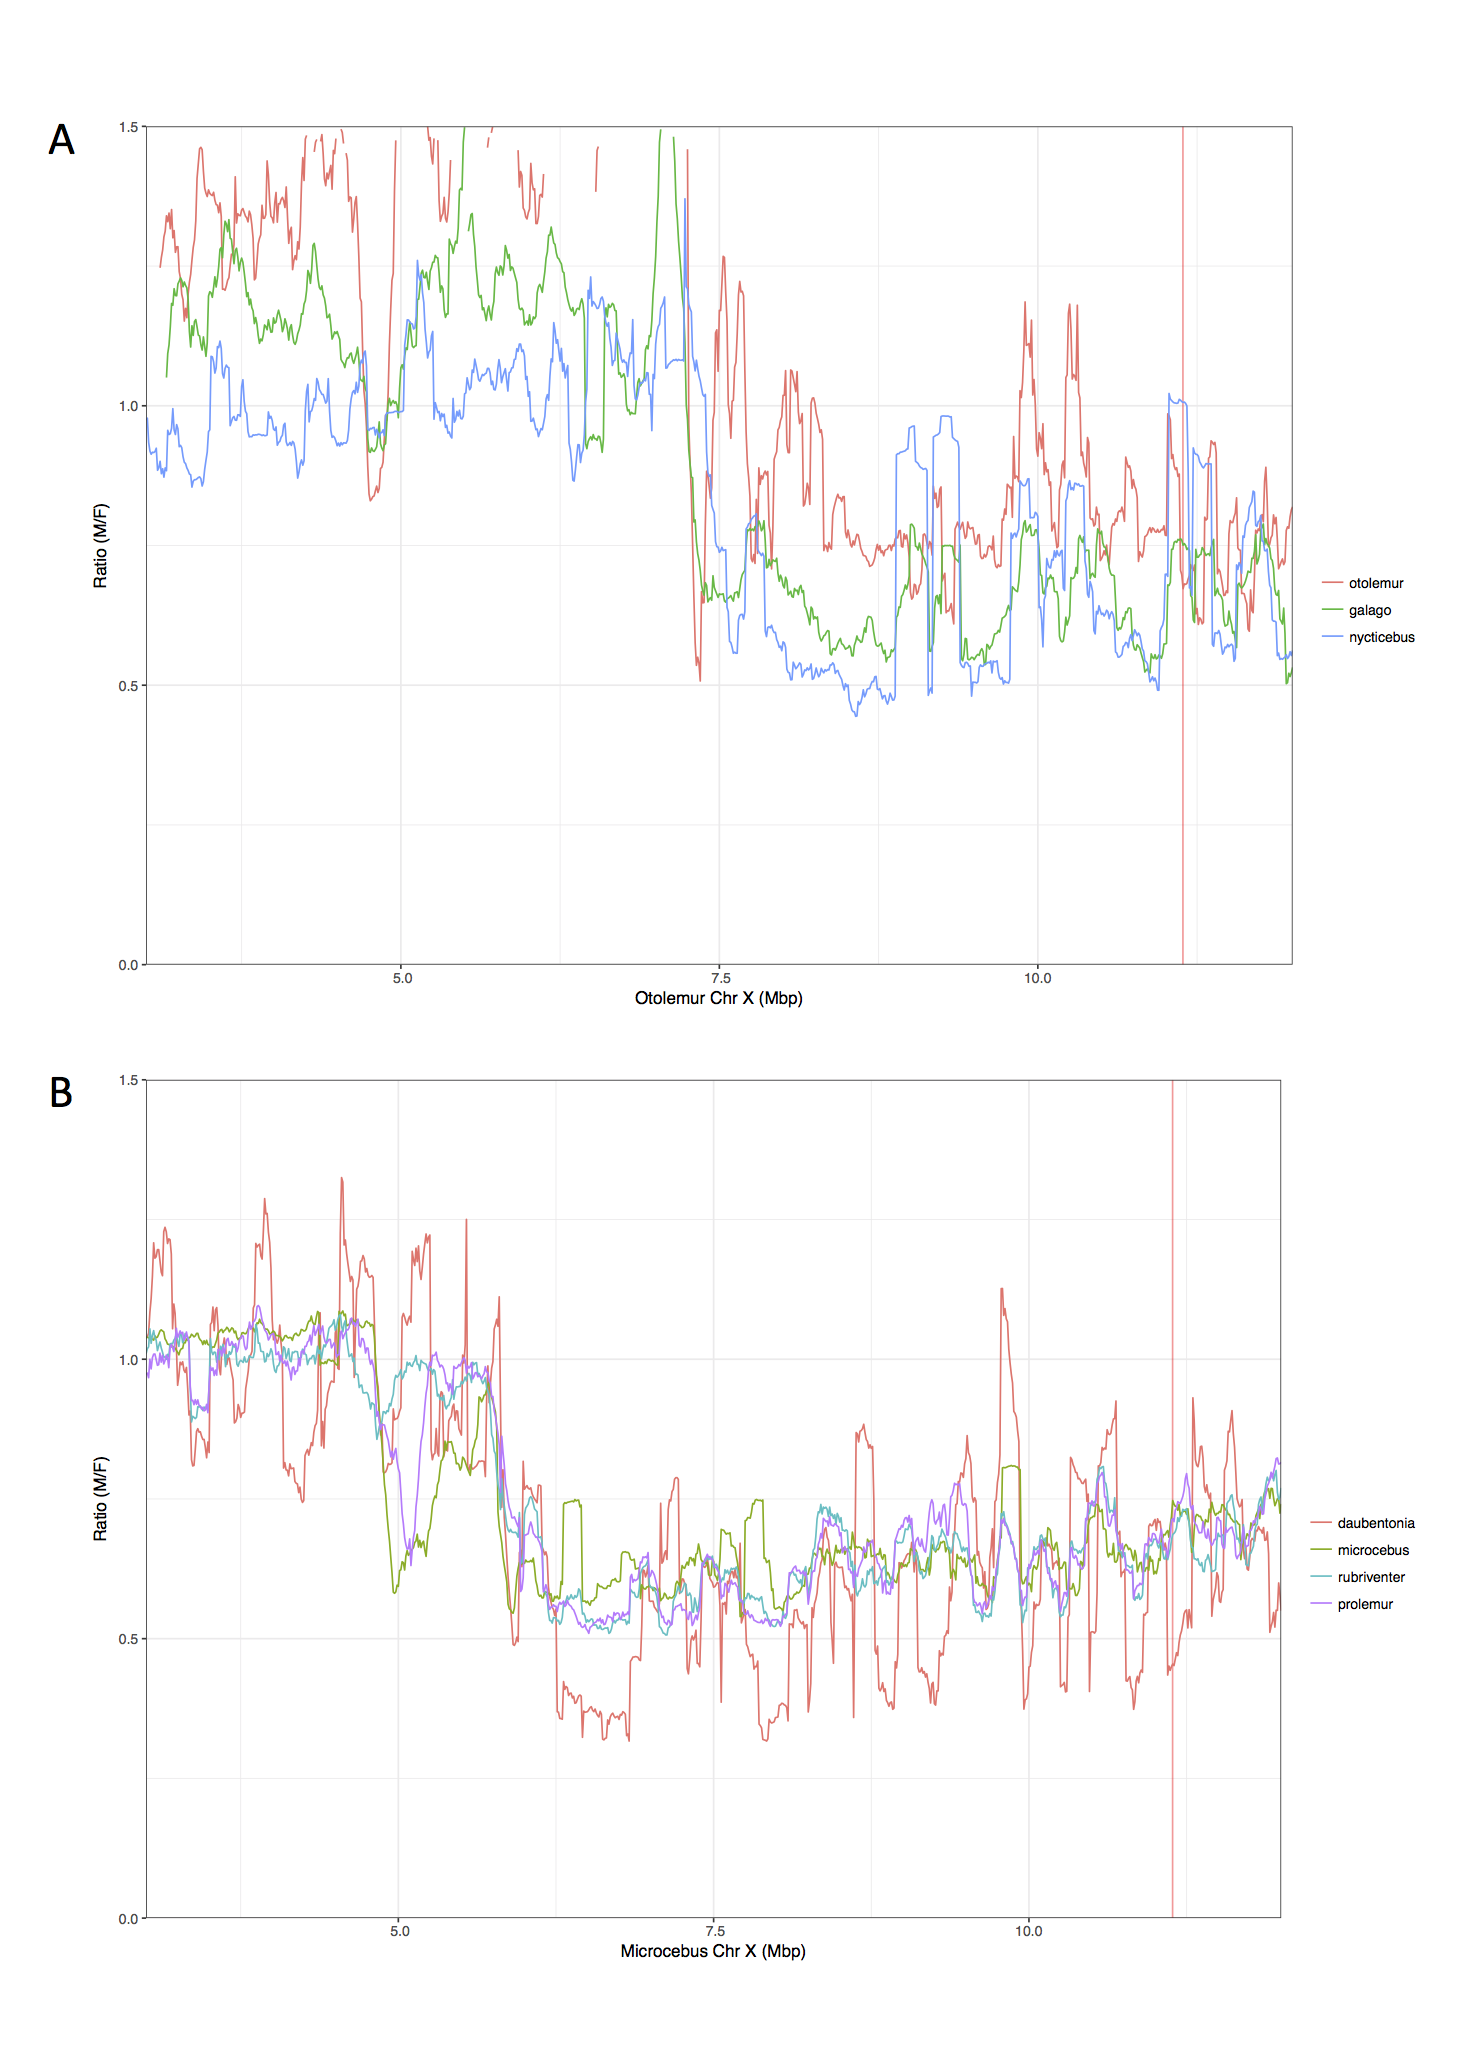

Supplement: supp [file elife_poa_e63650_Figure_1_figure_supplement_2.docx]
